# Supplementary material for: High levels of histones promote whole-genome-duplications and trigger a Swe1WEE1-dependent phosphorylation of Cdc28CDK1
Source: PubMed Central journal article supplement (PMC5871333; doi:10.7554/elife.35337), 2018-03-27
Supplement: elife-35337-fig2-data1.pdf [file elife-35337-fig2-data1.pdf]

|                                                          | RAW DATA |                      |     |                      |                      |     | PERCENTAGE            |      |      |                      |      |      |       |
|----------------------------------------------------------|----------|----------------------|-----|----------------------|----------------------|-----|-----------------------|------|------|----------------------|------|------|-------|
|                                                          | VECTOR   |                      |     | 2 $\mu$ $\Delta$ NEG |                      |     | VECTOR                |      |      | 2 $\mu$ $\Delta$ NEG |      |      |       |
|                                                          | A        | B                    | C   | 1                    | 2                    | 3   | A                     | B    | C    | 1                    | 2    | 3    |       |
| <b>G1</b>                                                | 111      | 191                  | 135 | 426                  | 265                  | 351 | 39,9                  | 45,8 | 46,6 | 66,1                 | 65,8 | 62,0 |       |
| <b>bud and 1 SPB</b>                                     | 67       | 61                   | 55  | 32                   | 34                   | 64  | 24,1                  | 14,6 | 19,0 | 5,0                  | 8,4  | 11,3 |       |
| <b>bud 2 SPBs and 1 kinetochore</b>                      | 35       | 65                   | 40  | 95                   | 64                   | 99  | 12,6                  | 15,6 | 13,8 | 14,8                 | 15,9 | 17,5 |       |
| <b>bud 2 SPBs and 2 kinetochores</b>                     | 46       | 61                   | 50  | 69                   | 22                   | 43  | 16,5                  | 14,6 | 17,2 | 10,7                 | 5,5  | 7,6  |       |
| <b>bud 2 SPBs and 2 kinetochores no tubulin filament</b> | 19       | 39                   | 10  | 22                   | 18                   | 9   | 6,8                   | 9,4  | 3,4  | 3,4                  | 4,5  | 1,6  |       |
| <b>n (each biological sample)</b>                        | 278      | 417                  | 290 | 644                  | 403                  | 566 |                       |      |      |                      |      |      |       |
| <b>n (each condition)</b>                                | 985      |                      |     | 1613                 |                      |     |                       |      |      |                      |      |      |       |
|                                                          | AVERAGE  |                      |     | SD                   |                      |     | T-TEST PAIRED SAMPLES |      |      |                      |      |      |       |
|                                                          | VECTOR   | 2 $\mu$ $\Delta$ NEG |     | VECTOR               | 2 $\mu$ $\Delta$ NEG |     |                       |      |      |                      |      |      |       |
| <b>No bud</b>                                            | 44,1     |                      |     | 64,6                 |                      |     | 3,63                  |      |      | 2,28                 |      |      | 0,022 |
| <b>bud and 1 SPB</b>                                     | 19,2     |                      |     | 8,2                  |                      |     | 4,74                  |      |      | 3,17                 |      |      | 0,115 |
| <b>bud 2 SPBs and 1 kinetochore</b>                      | 14,0     |                      |     | 16,0                 |                      |     | 1,51                  |      |      | 1,38                 |      |      | 0,173 |
| <b>bud 2 SPBs and 2 kinetochores</b>                     | 16,1     |                      |     | 7,9                  |                      |     | 1,35                  |      |      | 2,64                 |      |      | 0,021 |
| <b>bud 2 SPBs and 2 kinetochores no tubulin filament</b> | 6,5      |                      |     | 3,2                  |                      |     | 2,96                  |      |      | 1,46                 |      |      | 0,061 |

**Source data Figure 2b.** Raw data obtained in each of the three experiment performed to obtain the numbers represented in figure 2b

| DESCRIPTION                                                                                                      | vector   |     | 2 $\mu$ $\Delta$ NEG |    |
|------------------------------------------------------------------------------------------------------------------|----------|-----|----------------------|----|
|                                                                                                                  | raw data | %   | raw data             | %  |
| <b>Normal mitosis (nucleus in the mother at the onset of anaphase; nuclei in mother and daughter at the end)</b> | 181      | 97  | 168                  | 73 |
| <b>Mitosis starts in daughter cells (like type 1 but nucleus at the bud at the onset of anaphase)</b>            | 0        | 0   | 18                   | 8  |
| <b>Binucleation in bud: nuclei divide and remain in the bud. Cytokinesis takes place</b>                         | 0        | 0   | 2                    | 1  |
| <b>Cells seem to try to divide their nucleus near the bud neck but don't divide in at least 2 hours</b>          | 6        | 3   | 41                   | 18 |
|                                                                                                                  | n        | 187 | 229                  |    |

**Source data Figure 2c.** Data corresponding to the quantification of the different types of cell divisions observed in the films performed with the first biological replicate.
