# Supplementary material for: High levels of histones promote whole-genome-duplications and trigger a Swe1WEE1-dependent phosphorylation of Cdc28CDK1
Source: PubMed Central journal article supplement (PMC5871333; doi:10.7554/elife.35337), 2018-03-27
Supplement: elife-35337-fig3-data1.pdf [file elife-35337-fig3-data1.pdf]

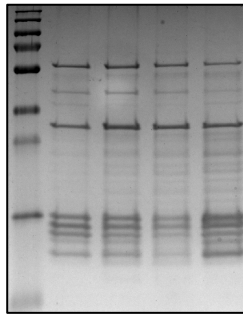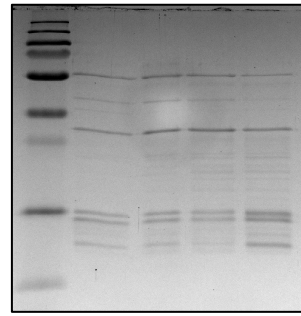

| 1st experiment         |     | NON-SPECIFIC (NS) BAND | HISTONE SIGNAL (HS) | HS/NS | relative to rad53-AID control |
|------------------------|-----|------------------------|---------------------|-------|-------------------------------|
| <i>rad53-AID</i>       | -   | 8.466.648              | 26.932.877          | 3,18  | 1,00                          |
|                        | NAA | 10.735.648             | 29.300.635          | 2,73  | 0,86                          |
| <i>rad53-AID Ism1Δ</i> | -   | 9.438.234              | 21.198.271          | 2,25  | 0,71                          |
|                        | NAA | 9.051.527              | 34.409.999          | 3,80  | 1,20                          |

| 2nd experiment         |     | NON-SPECIFIC (NS) BAND | HISTONE SIGNAL (HS) | HS/NS | relative to rad53-AID control |
|------------------------|-----|------------------------|---------------------|-------|-------------------------------|
| <i>rad53-AID</i>       | -   | 9.246.062              | 16.259.371          | 1,76  | 1,00                          |
|                        | NAA | 9.897.355              | 17.414.421          | 1,76  | 1,00                          |
| <i>rad53-AID Ism1Δ</i> | -   | 10.742.355             | 14.898.250          | 1,39  | 0,79                          |
|                        | NAA | 9.068.770              | 22.048.735          | 2,43  | 1,38                          |

| t-test (paired, 2 tails) |     |                  |       |                        |       |
|--------------------------|-----|------------------|-------|------------------------|-------|
|                          |     | <i>rad53-AID</i> |       | <i>rad53-AID Ism1Δ</i> |       |
|                          |     | -                | NAA   | -                      | NAA   |
| <i>rad53-AID</i>         | -   | -                | 0.501 | 0.259                  | 0.026 |
|                          | NAA | -                | -     | 0.082                  | 0.144 |
| <i>rad53-AID Ism1Δ</i>   | -   | -                | -     | -                      | 0.124 |
|                          | NAA | -                | -     | -                      | -     |

**Source data Figure 3a.** CBR staining for each of the two experiments in which core histones have been purified from *rad53-AID* and *rad53-AID Ism1Δ* cells treated or not with NAA and synchronized with Nocodazole. Quantification and statistics are shown below.

|                        | % of diploid cells |     |             |      |
|------------------------|--------------------|-----|-------------|------|
|                        | replicate 1        |     | replicate 2 |      |
|                        | DMSO               | NAA | DMSO        | NAA  |
| haploid                | 100                | 90  | 100         | 70   |
| diploid                | 0                  | 10  | 0           | 5    |
| <i>rad53-AID Ism1Δ</i> | 0                  | 10  | 0           | 6,66 |
| n                      | 100                | 100 | 75          | 75   |

t-test (2 tails, unequal variance) | 0,038

**Source data Figure 3g.** Number of diploids observed by FACS in *rad53-AID Ism1Δ* cells after a 4 hour treatment with DMSO or NAA. This experiment was performed twice. In the first experiment, we counted 100 colonies for each condition. In the second one, we counted 75.

| 1st experiment                   | number of colonies |         | survival (NAA/untreated) % |
|----------------------------------|--------------------|---------|----------------------------|
|                                  | expected           | counted |                            |
| rad53-AID untreated              | 100                | 108     | 80,6                       |
|                                  | 200                | 191     | 91,1                       |
| rad53-AID+NAA                    | 100                | 87      |                            |
|                                  | 200                | 174     |                            |
| rad53-AID <i>lsm1Δ</i> untreated | 100                | 68      | 2,9                        |
|                                  | 200                | 101     | 3,0                        |
| rad53-AID <i>lsm1Δ</i> +NAA      | 100                | 2       |                            |
|                                  | 200                | 3       |                            |

t-test (paired, two tails) 0,0006

| 2nd experiment                   | number of colonies |         | survival (NAA/untreated) % |
|----------------------------------|--------------------|---------|----------------------------|
|                                  | expected           | counted |                            |
| rad53-AID untreated              | 100                | 77      | 124,7                      |
|                                  | 200                | 124     | 106,5                      |
| rad53-AID+NAA                    | 100                | 96      |                            |
|                                  | 200                | 132     |                            |
| rad53-AID <i>lsm1Δ</i> untreated | 100                | 40      | 17,5                       |
|                                  | 200                | 72      | 12,5                       |
| rad53-AID <i>lsm1Δ</i> +NAA      | 100                | 7       |                            |
|                                  | 200                | 9       |                            |

**Source data Figure 3-Figure Supplement 3d.** Relative colony formation assay data used to determine the number of viable cells after a four-hour treatment with NAA in *rad53-AID* and *rad53-AID lsm1Δ* mutants. % of viable cells is estimated dividing the number of viable cells obtained between in treated extracts divided by the number obtained in non-treated samples.

|           | biological replicate | RED(viable cells) | GREEN (dead cells) (%) | n    | Nº of dead cells (%) |                            |        |        |     |     |     |
|-----------|----------------------|-------------------|------------------------|------|----------------------|----------------------------|--------|--------|-----|-----|-----|
|           |                      |                   |                        |      | AVERAGE              | SD                         | SEM    |        |     |     |     |
| wild type | vector               | 1                 | 99,0                   | 1,0  | 306                  | wild type                  | vector | 1,6    | 1,2 | 0,7 |     |
|           |                      | 2                 | 99,2                   | 0,8  | 257                  |                            |        | 2μΔNEG | 7,7 | 2,8 | 1,6 |
|           |                      | 3                 | 95,7                   | 3,0  | 300                  |                            |        |        |     |     |     |
| 2μΔNEG    | 1                    | 1                 | 92,9                   | 7,1  | 240                  | t-test (paired, two tails) |        | 0,11   |     |     |     |
|           |                      | 2                 | 89,2                   | 10,8 | 204                  |                            |        |        |     |     |     |
|           |                      | 3                 | 94,7                   | 5,3  | 227                  |                            |        |        |     |     |     |

**Source data Figure 3-Figure Supplement 3e.** % of green cells (dead cells, unable to metabolise the compound) compared to red cells (able to metabolise the compound) observed in three independent experiments in wild type cells transformed with an empty vector or the 2μΔNEG vector.

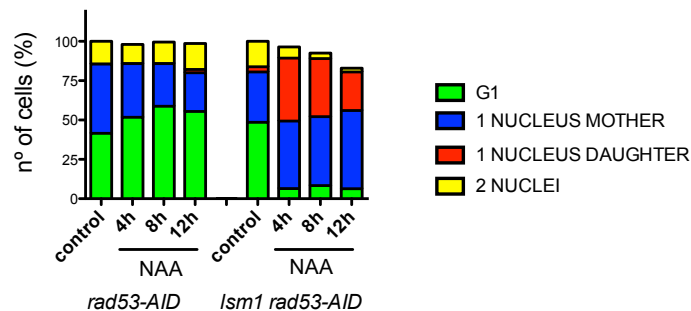

| <i>rad53-AID</i>           | 1st experiment (%) |        |        |         | 2nd experiment (%) |        |        |         |
|----------------------------|--------------------|--------|--------|---------|--------------------|--------|--------|---------|
|                            | AS                 | 4H NAA | 8H NAA | 12H NAA | AS                 | 4H NAA | 8H NAA | 12H NAA |
| G1                         | 35,4               | 38,8   | 45,8   | 80,6    | 41,5               | 51,8   | 58,8   | 55,4    |
| bud, 1 nucleus in mother   | 45,5               | 48,8   | 38,3   | 12,2    | 44,0               | 34,1   | 27,0   | 24,6    |
| bud, 1 nucleus in daughter | 0,0                | 0,0    | 0,0    | 0,0     | 0,0                | 0,0    | 0,0    | 2,2     |
| bud, two nuclei            | 19,2               | 11,9   | 15,4   | 5,9     | 14,5               | 12,2   | 13,7   | 16,5    |
| n                          | 198                | 201    | 201    | 222     | 207                | 164    | 204    | 224     |

| <i>rad53-AID lsm1Δ</i>     | 1st experiment (%) |        |        |         | 2nd experiment (%) |        |        |         |
|----------------------------|--------------------|--------|--------|---------|--------------------|--------|--------|---------|
|                            | AS                 | 4H NAA | 8H NAA | 12H NAA | AS                 | 4H NAA | 8H NAA | 12H NAA |
| G1                         | 23,4               | 5,5    | 7,0    | 9,2     | 48,6               | 6,4    | 8,4    | 6,3     |
| bud, 1 nucleus in mother   | 44,0               | 47,6   | 42,2   | 44,2    | 31,9               | 42,9   | 43,8   | 49,7    |
| bud, 1 nucleus in daughter | 19,6               | 46,3   | 40,6   | 35,0    | 3,3                | 40,0   | 36,9   | 24,6    |
| bud, two nuclei            | 10,5               | 0,0    | 0,8    | 2,5     | 16,2               | 7,1    | 3,4    | 2,3     |
| n                          | 209                | 164    | 128    | 120     | 210                | 140    | 203    | 175     |

**Source data Figure 3-Figure Supplement 3f.** Raw data obtained in the two cell cycle kinetics performed to determine changes in the cell cycle distribution of *rad53-AID* and *rad53-AID lsm1Δ* cells after treatment with NAA. Cells were fixed, stained with DAPI and classified according to morphology and number of nuclei using a 100x objective. The image on the top represents the numbers obtained in the second experiment, not included in the main text.
