# Supplementary material for: High levels of histones promote whole-genome-duplications and trigger a Swe1WEE1-dependent phosphorylation of Cdc28CDK1
Source: PubMed Central journal article supplement (PMC5871333; doi:10.7554/elife.35337), 2018-03-27
Supplement: elife-35337-fig4-data1.pdf [file elife-35337-fig4-data1.pdf]

| % IP HISTONE H3      |                              |          |          |                              |          |          |                                   |          |          |                                   |          |          |
|----------------------|------------------------------|----------|----------|------------------------------|----------|----------|-----------------------------------|----------|----------|-----------------------------------|----------|----------|
| BIOLOGICAL REPLICATE | <i>rad53-AID CONTROL (1)</i> |          |          | <i>rad53-AID TREATED (2)</i> |          |          | <i>lsm1 rad53-AID CONTROL (3)</i> |          |          | <i>lsm1 rad53-AID TREATED (4)</i> |          |          |
|                      | 1                            | 2        | 3        | 1                            | 2        | 3        | 1                                 | 2        | 3        | 1                                 | 2        | 3        |
| CEN4                 | 9,24E-03                     | 7,22E-03 | 1,89E-02 | 8,20E-03                     | 2,13E-02 | 2,63E-02 | 3,66E-02                          | 5,42E-02 | 5,93E-02 | 1,50E-01                          | 2,47E-01 | 3,05E-01 |
| CEN12                | 1,43E-02                     | 6,99E-03 | 1,78E-02 | 6,74E-03                     | 1,43E-02 | 2,00E-02 | 3,48E-02                          | 2,30E-02 | 6,52E-02 | 1,64E-01                          | 2,37E-01 | 3,55E-01 |
| INT IV               | 4,26E-02                     | 4,32E-02 | 8,59E-02 | 2,88E-02                     | 4,76E-02 | 8,91E-02 | 5,55E-02                          | 3,96E-02 | 1,01E-01 | 3,20E-01                          | 3,64E-01 | 7,14E-01 |
| INT XII              | 1,43E-01                     | 1,17E-01 | 2,62E-01 | 1,06E-01                     | 1,84E-01 | 2,99E-01 | 1,21E-01                          | 9,46E-02 | 2,38E-01 | 2,83E-01                          | 4,09E-01 | 7,07E-01 |
| ALG9                 | 1,29E-01                     | 1,13E-01 | 2,62E-01 | 9,07E-02                     | 1,54E-01 | 2,50E-01 | 1,29E-01                          | 1,02E-01 | 2,24E-01 | 2,76E-01                          | 4,37E-01 | 6,25E-01 |

  

| % IP HISTONE H4      |                              |          |          |                              |          |          |                                   |          |          |                                   |          |          |
|----------------------|------------------------------|----------|----------|------------------------------|----------|----------|-----------------------------------|----------|----------|-----------------------------------|----------|----------|
| BIOLOGICAL REPLICATE | <i>rad53-AID CONTROL (1)</i> |          |          | <i>rad53-AID TREATED (2)</i> |          |          | <i>lsm1 rad53-AID CONTROL (3)</i> |          |          | <i>lsm1 rad53-AID TREATED (4)</i> |          |          |
|                      | 1                            | 2        | 3        | 1                            | 2        | 3        | 1                                 | 2        | 3        | 1                                 | 2        | 3        |
| CEN4                 | 2,04E-02                     | 3,02E-02 | 2,78E-02 | 1,92E-02                     | 4,20E-02 | 2,90E-02 | 5,94E-02                          | 5,27E-02 | 4,85E-02 | 9,85E-02                          | 1,56E-01 | 1,28E-01 |
| CEN12                | 2,97E-02                     | 2,86E-02 | 2,95E-02 | 1,81E-02                     | 3,66E-02 | 2,49E-02 | 5,10E-02                          | 4,07E-02 | 3,94E-02 | 1,01E-01                          | 1,84E-01 | 1,35E-01 |
| INT IV               | 9,99E-02                     | 1,29E-01 | 1,30E-01 | 8,10E-02                     | 1,27E-01 | 9,38E-02 | 1,37E-01                          | 1,02E-01 | 1,06E-01 | 1,53E-01                          | 2,26E-01 | 2,13E-01 |
| INT XII              | 2,26E-01                     | 2,49E-01 | 3,30E-01 | 2,07E-01                     | 2,84E-01 | 2,29E-01 | 2,65E-01                          | 2,14E-01 | 2,08E-01 | 1,80E-01                          | 2,66E-01 | 2,35E-01 |
| ALG9                 | 1,95E-01                     | 2,20E-01 | 3,18E-01 | 2,19E-01                     | 2,50E-01 | 2,12E-01 | 2,71E-01                          | 1,93E-01 | 2,18E-01 | 1,71E-01                          | 2,68E-01 | 2,30E-01 |

  

| % IP CENP-A          |                              |          |          |                              |          |          |                                   |          |          |                                   |          |          |
|----------------------|------------------------------|----------|----------|------------------------------|----------|----------|-----------------------------------|----------|----------|-----------------------------------|----------|----------|
| BIOLOGICAL REPLICATE | <i>rad53-AID CONTROL (1)</i> |          |          | <i>rad53-AID TREATED (2)</i> |          |          | <i>lsm1 rad53-AID CONTROL (3)</i> |          |          | <i>lsm1 rad53-AID TREATED (4)</i> |          |          |
|                      | 1                            | 2        | 3        | 1                            | 2        | 3        | 1                                 | 2        | 3        | 1                                 | 2        | 3        |
| CEN4                 | 4,83E-02                     | 5,94E-02 | 5,09E-02 | 5,97E-02                     | 7,08E-02 | 6,63E-02 | 7,33E-02                          | 6,17E-02 | 6,05E-02 | 4,91E-02                          | 1,01E-01 | 7,69E-02 |
| CEN12                | 4,41E-02                     | 3,13E-02 | 2,20E-02 | 3,09E-02                     | 3,22E-02 | 2,45E-02 | 4,68E-02                          | 3,11E-02 | 3,14E-02 | 4,27E-02                          | 9,95E-02 | 8,83E-02 |
| INT IV               | 5,34E-04                     | 9,57E-04 | 8,14E-04 | 4,40E-04                     | 1,61E-03 | 1,10E-03 | 1,10E-03                          | 1,02E-03 | 8,64E-04 | 1,27E-03                          | 3,24E-03 | 2,45E-03 |
| INT XII              | 6,93E-04                     | 1,36E-03 | 1,83E-03 | 8,39E-04                     | 3,18E-03 | 2,36E-03 | 1,21E-03                          | 1,28E-03 | 1,64E-03 | 1,39E-03                          | 3,40E-03 | 2,96E-03 |
| ALG9                 | 6,93E-04                     | 1,36E-03 | 2,78E-03 | 7,40E-04                     | 2,84E-03 | 2,56E-03 | 1,18E-03                          | 1,52E-03 | 1,54E-03 | 1,47E-03                          | 3,30E-03 | 3,68E-03 |

| T-TEST PAIRED SAMPLES (2 TAILS) |        |        |              |        |        |            |          |          |          |   |   |  |
|---------------------------------|--------|--------|--------------|--------|--------|------------|----------|----------|----------|---|---|--|
| HISTONE H3                      | 1 VS 2 | 1 VS 3 | 1 VS 4       | 2 VS 4 | 3 VS 4 | % IP NO AB |          |          |          |   |   |  |
|                                 |        |        |              |        |        | 1          | 2        | 3        | 1        | 2 | 3 |  |
| CEN4                            | 0,260  | 0,022  | <b>0,035</b> | 0,032  | 0,041  | CEN4       | 5,30E-04 | 7,40E-04 | 5,50E-04 |   |   |  |
| CEN12                           | 0,899  | 0,104  | <b>0,048</b> | 0,044  | 0,045  | CEN12      | 5,57E-04 | 4,26E-04 | 3,71E-04 |   |   |  |
| INT IV                          | 0,755  | 0,304  | <b>0,066</b> | 0,062  | 0,065  | INT IV     | 2,93E-04 | 3,61E-04 | 2,67E-04 |   |   |  |
| INT XII                         | 0,547  | 0,001  | <b>0,080</b> | 0,062  | 0,071  | INT XII    | 3,91E-04 | 8,07E-04 | 5,55E-04 |   |   |  |
| ALG9                            | 0,914  | 0,295  | <b>0,053</b> | 0,036  | 0,061  | ALG9       | 4,62E-04 | 6,41E-04 | 3,63E-04 |   |   |  |

  

| HISTONE H4 | 1 VS 2 | 1 VS 3 | 1 VS 4       | 2 VS 4       | 3 VS 4 |
|------------|--------|--------|--------------|--------------|--------|
|            | CEN4   | 0,428  | 0,042        | <b>0,018</b> | 0,011  |
| CEN12      | 0,678  | 0,053  | <b>0,045</b> | 0,026        | 0,070  |
| INT IV     | 0,203  | 0,841  | <b>0,027</b> | 0,019        | 0,134  |
| INT XII    | 0,551  | 0,491  | <b>0,334</b> | 0,319        | 0,964  |
| ALG9       | 0,737  | 0,769  | <b>0,643</b> | 0,869        | 0,943  |

  

| CENP-A  | 1 VS 2 | 1 VS 3 | 1 VS 4      | 2 VS 4      | 3 VS 4 |
|---------|--------|--------|-------------|-------------|--------|
|         | CEN4   | 0,01   | 0,21        | <b>0,19</b> | 0,48   |
| CEN12   | 0,58   | 0,30   | <b>0,19</b> | 0,12        | 0,21   |
| INT IV  | 0,32   | 0,32   | <b>0,07</b> | 0,03        | 0,16   |
| INT XII | 0,24   | 0,76   | <b>0,08</b> | 0,06        | 0,17   |
| ALG9    | 0,49   | 0,75   | <b>0,08</b> | 0,06        | 0,13   |

Source data Figure 4a. ChIP raw data represented in figure 4a. p-values obtained are also presented below

| ASYNCHRONOUS CULTURES   |                              |        |        |                              |        |        |                                   |        |        |                                   |        |        |
|-------------------------|------------------------------|--------|--------|------------------------------|--------|--------|-----------------------------------|--------|--------|-----------------------------------|--------|--------|
| % IP MTW1-mCH REPLICATE | <i>rad53-AID CONTROL (1)</i> |        |        | <i>rad53-AID TREATED (2)</i> |        |        | <i>lsm1 rad53-AID CONTROL (3)</i> |        |        | <i>lsm1 rad53-AID TREATED (4)</i> |        |        |
|                         | 1                            | 2      | 3      | 1                            | 2      | 3      | 1                                 | 2      | 3      | 1                                 | 2      | 3      |
| CEN4                    | 6,3623                       | 6,1334 | 8,4952 | 6,4225                       | 5,5030 | 9,2923 | 4,5754                            | 5,2982 | 8,8098 | 7,9827                            | 6,9326 | 6,7861 |
| CEN12                   | 1,6055                       | 1,5633 | 4,3481 | 0,9640                       | 1,3537 | 2,8005 | 1,5970                            | 2,3445 | 3,4296 | 5,3580                            | 5,6918 | 4,7060 |
| INT IV                  | 0,0000                       | 0,0000 | 0,0048 | 0,0000                       | 0,0000 | 0,0000 | 0,0000                            | 0,0000 | 0,0210 | 0,0045                            | 0,0000 | 0,0036 |
| ALG9                    | 0,0000                       | 0,0032 | 0,0004 | 0,0036                       | 0,0000 | 0,0000 | 0,0000                            | 0,0000 | 0,0205 | 0,0000                            | 0,0057 | 0,0000 |

  

| T-TEST PAIRED SAMPLES (2 TAILS) |        |        |              |              |        |       |  |  |  |  |  |  |
|---------------------------------|--------|--------|--------------|--------------|--------|-------|--|--|--|--|--|--|
| HISTONE H3                      | 1 VS 2 | 1 VS 3 | 1 VS 4       | 2 VS 4       | 3 VS 4 |       |  |  |  |  |  |  |
|                                 | CEN4   | 0,871  | 0,333        | <b>0,835</b> | 0,915  | 0,594 |  |  |  |  |  |  |
| CEN12                           | 0,180  | 0,930  | <b>0,149</b> | 0,050        | 0,068  |       |  |  |  |  |  |  |
| INT IV                          | 0,423  | 0,423  | <b>0,584</b> | 0,188        | 0,586  |       |  |  |  |  |  |  |
| ALG9                            | 0,995  | 0,522  | <b>0,512</b> | 0,817        | 0,598  |       |  |  |  |  |  |  |

  

| SYNCHRONIZED CULTURES   |                              |        |        |                              |        |        |                                   |        |   |                                   |   |  |
|-------------------------|------------------------------|--------|--------|------------------------------|--------|--------|-----------------------------------|--------|---|-----------------------------------|---|--|
| % IP MTW1-mCH REPLICATE | <i>rad53-AID CONTROL (1)</i> |        |        | <i>rad53-AID TREATED (2)</i> |        |        | <i>lsm1 rad53-AID CONTROL (3)</i> |        |   | <i>lsm1 rad53-AID TREATED (4)</i> |   |  |
|                         | 1                            | 2      | 1      | 2                            | 1      | 2      | 1                                 | 2      | 1 | 2                                 | 1 |  |
| CEN4                    | 3,2020                       | 3,6200 | 2,6611 | 1,8939                       | 2,3730 | 1,4268 | 1,7445                            | 2,7091 |   |                                   |   |  |
| CEN12                   | 1,0543                       | 1,1403 | 0,7559 | 0,6520                       | 0,6889 | 0,7057 | 1,5308                            | 1,8551 |   |                                   |   |  |
| INT IV                  | 0,0010                       | 0,0020 | 0,0006 | 0,0011                       | 0,0010 | 0,0021 | 0,0017                            | 0,0035 |   |                                   |   |  |
| ALG9                    | 0,0020                       | 0,0020 | 0,0017 | 0,0015                       | 0,0012 | 0,0031 | 0,0023                            | 0,0022 |   |                                   |   |  |

  

| T-TEST PAIRED SAMPLES (2 TAILS) |        |        |              |              |        |       |  |  |  |  |  |  |
|---------------------------------|--------|--------|--------------|--------------|--------|-------|--|--|--|--|--|--|
| HISTONE H3                      | 1 VS 2 | 1 VS 3 | 1 VS 4       | 2 VS 4       | 3 VS 4 |       |  |  |  |  |  |  |
|                                 | CEN4   | 0,307  | 0,270        | <b>0,144</b> | 0,963  | 0,790 |  |  |  |  |  |  |
| CEN12                           | 0,151  | 0,055  | <b>0,126</b> | 0,136        | 0,098  |       |  |  |  |  |  |  |
| INT IV                          | 0,246  | 0,779  | <b>0,230</b> | 0,236        | 0,199  |       |  |  |  |  |  |  |
| ALG9                            | 0,173  | 0,897  | <b>0,064</b> | 0,080        | 0,935  |       |  |  |  |  |  |  |

Source data Figure 4b and c. ChIP raw data represented in figures 4b (up) and 4c (low). p-values obtained are also presented below.
