# Supplementary material for: High levels of histones promote whole-genome-duplications and trigger a Swe1WEE1-dependent phosphorylation of Cdc28CDK1
Source: PubMed Central journal article supplement (PMC5871333; doi:10.7554/elife.35337), 2018-03-27
Supplement: elife-35337-fig5-data1.pdf [file elife-35337-fig5-data1.pdf]

| % IP HISTONE H2B<br>BIOLOGICAL REPLICATE | <i>rad53-AID</i> CONTROL (1) |          |          | <i>rad53-AID</i> TREATED (2) |          |          | <i>Ism1 rad53-AID</i> CONTROL (3) |          |          | <i>Ism1 rad53-AID</i> TREATED (4) |          |          |
|------------------------------------------|------------------------------|----------|----------|------------------------------|----------|----------|-----------------------------------|----------|----------|-----------------------------------|----------|----------|
|                                          | 1                            | 2        | 3        | 1                            | 2        | 3        | 1                                 | 2        | 3        | 1                                 | 2        | 3        |
| CEN4 L                                   | 1,04E-01                     | 2,09E-01 | 2,95E-01 | 1,32E-01                     | 1,78E-01 | 1,98E-01 | 1,79E-01                          | 2,10E-01 | 2,59E-01 | 4,49E-01                          | 5,08E-01 | 4,40E-01 |
| CEN4 R                                   | 1,43E-01                     | 2,13E-01 | 2,45E-01 | 2,03E-01                     | 2,45E-01 | 1,81E-01 | 2,31E-01                          | 2,67E-01 | 2,20E-01 | 4,29E-01                          | 5,63E-01 | 4,62E-01 |
| CEN12 L                                  | 9,98E-02                     | 1,31E-01 | 2,18E-01 | 1,49E-01                     | 1,55E-01 | 1,82E-01 | 2,21E-01                          | 1,85E-01 | 2,69E-01 | 3,82E-01                          | 5,76E-01 | 5,22E-01 |
| CEN12 R                                  | 1,16E-01                     | 1,60E-01 | 2,02E-01 | 1,28E-01                     | 1,65E-01 | 1,59E-01 | 2,27E-01                          | 2,47E-01 | 2,65E-01 | 4,15E-01                          | 5,41E-01 | 5,83E-01 |
| INT IV                                   | 1,29E-01                     | 2,04E-01 | 2,76E-01 | 1,39E-01                     | 1,57E-01 | 1,54E-01 | 2,24E-01                          | 2,19E-01 | 2,93E-01 | 4,05E-01                          | 5,89E-01 | 5,60E-01 |
| INT XII                                  | 4,10E-01                     | 5,34E-01 | 8,94E-01 | 5,23E-01                     | 3,99E-01 | 5,56E-01 | 5,16E-01                          | 2,52E-01 | 6,47E-01 | 4,57E-01                          | 3,28E-01 | 5,70E-01 |
| ALG9                                     | 3,44E-01                     | 4,00E-01 | 6,08E-01 | 4,28E-01                     | 4,26E-01 | 5,02E-01 | 4,15E-01                          | 2,42E-01 | 5,85E-01 | 3,86E-01                          | 5,70E-01 | 5,05E-01 |

T-TEST PAIRED SAMPLES

|         | 1 VS 2 | 1 VS 3 | 1 VS 4       | 2 VS 4 | 3 VS 4 |
|---------|--------|--------|--------------|--------|--------|
| CEN4 L  | 0,455  | 0,719  | <b>0,049</b> | 0,009  | 0,020  |
| CEN4 R  | 0,826  | 0,369  | <b>0,018</b> | 0,009  | 0,013  |
| CEN12 L | 0,676  | 0,083  | <b>0,021</b> | 0,026  | 0,057  |
| CEN12 R | 0,648  | 0,024  | <b>0,006</b> | 0,012  | 0,022  |
| INT IV  | 0,298  | 0,248  | <b>0,012</b> | 0,019  | 0,038  |
| INT XII | 0,454  | 0,372  | <b>0,278</b> | 0,277  | 0,719  |
| ALG9    | 0,984  | 0,635  | <b>0,691</b> | 0,595  | 0,627  |

| % IP HISTONE H2A<br>BIOLOGICAL REPLICATE | <i>rad53-AID</i> CONTROL (1) |          |          | <i>rad53-AID</i> TREATED (2) |          |          | <i>Ism1 rad53-AID</i> CONTROL (3) |          |          | <i>Ism1 rad53-AID</i> TREATED (4) |          |          |
|------------------------------------------|------------------------------|----------|----------|------------------------------|----------|----------|-----------------------------------|----------|----------|-----------------------------------|----------|----------|
|                                          | 1                            | 2        | 3        | 1                            | 2        | 3        | 1                                 | 2        | 3        | 1                                 | 2        | 3        |
| CEN4 L                                   | 1,86E-01                     | 3,65E-02 | 7,15E-02 | 1,41E-01                     | 5,27E-02 | 8,56E-02 | 2,17E-01                          | 5,88E-02 | 7,24E-02 | 3,94E-01                          | 2,20E-01 | 3,11E-01 |
| CEN4 R                                   | 1,84E-01                     | 3,83E-02 | 7,20E-02 | 1,05E-01                     | 4,87E-02 | 6,74E-02 | 2,51E-01                          | 7,18E-02 | 8,74E-02 | 4,27E-01                          | 1,79E-01 | 3,24E-01 |
| CEN12 L                                  | 1,34E-01                     | 2,32E-02 | 4,07E-02 | 9,51E-02                     | 5,22E-02 | 5,88E-02 | 1,90E-01                          | 4,28E-02 | 5,15E-02 | 4,29E-01                          | 2,26E-01 | 3,02E-01 |
| CEN12 R                                  | 1,18E-01                     | 2,83E-02 | 4,49E-02 | 8,18E-02                     | 3,22E-02 | 5,42E-02 | 1,75E-01                          | 4,72E-02 | 5,33E-02 | 3,92E-01                          | 2,27E-01 | 2,89E-01 |
| INT IV                                   | 1,89E-01                     | 4,01E-02 | 6,05E-02 | 1,01E-01                     | 4,64E-02 | 5,26E-02 | 2,30E-01                          | 5,95E-02 | 7,23E-02 | 5,13E-01                          | 2,17E-01 | 3,26E-01 |
| INT XII                                  | 3,32E-01                     | 8,64E-02 | 1,44E-01 | 2,94E-01                     | 1,06E-01 | 1,24E-01 | 3,60E-01                          | 1,58E-01 | 1,57E-01 | 5,44E-01                          | 2,34E-01 | 3,32E-01 |

T-TEST PAIRED SAMPLES

|         | 1 VS 2 | 1 VS 3 | 1 VS 4       | 2 VS 4 | 3 VS 4 |
|---------|--------|--------|--------------|--------|--------|
| CEN4 L  | 0,831  | 0,180  | <b>0,006</b> | 0,013  | 0,015  |
| CEN4 R  | 0,471  | 0,123  | <b>0,027</b> | 0,053  | 0,043  |
| CEN12 L | 0,906  | 0,173  | <b>0,011</b> | 0,033  | 0,009  |
| CEN12 R | 0,647  | 0,196  | <b>0,008</b> | 0,018  | 0,006  |
| INT IV  | 0,416  | 0,108  | <b>0,027</b> | 0,055  | 0,026  |
| INT XII | 0,534  | 0,164  | <b>0,010</b> | 0,032  | 0,053  |

| % IP HISTONE H2A.Z<br>BIOLOGICAL REPLICATE | <i>rad53-AID</i> CONTROL (1) |          |          | <i>rad53-AID</i> TREATED (2) |          |          | <i>Ism1 rad53-AID</i> CONTROL (3) |          |          | <i>Ism1 rad53-AID</i> TREATED (4) |          |          |
|--------------------------------------------|------------------------------|----------|----------|------------------------------|----------|----------|-----------------------------------|----------|----------|-----------------------------------|----------|----------|
|                                            | 1                            | 2        | 3        | 1                            | 2        | 3        | 1                                 | 2        | 3        | 1                                 | 2        | 3        |
| CEN4 L                                     | 3,27E-02                     | 2,63E-02 | 1,74E-02 | 2,28E-02                     | 2,23E-02 | 9,58E-03 | 1,43E-02                          | 2,05E-02 | 2,29E-02 | 6,16E-03                          | 7,43E-03 | 5,98E-03 |
| CEN4 R                                     | 2,43E-02                     | 1,80E-02 | 2,57E-02 | 1,79E-02                     | 1,71E-02 | 1,73E-02 | 1,64E-02                          | 2,41E-02 | 7,59E-03 | 6,53E-03                          | 8,25E-03 | 6,20E-03 |
| CEN12 L                                    | 3,91E-02                     | 3,17E-02 | 4,11E-02 | 3,43E-02                     | 3,43E-02 | 3,07E-02 | 1,87E-02                          | 2,04E-02 | 2,45E-02 | 6,47E-03                          | 1,09E-02 | 5,56E-03 |
| CEN12 R                                    | 3,06E-02                     | 2,24E-02 | 2,88E-02 | 2,23E-02                     | 2,35E-02 | 1,75E-02 | 1,73E-02                          | 1,91E-02 | 1,64E-02 | 5,71E-03                          | 6,70E-03 | 5,75E-03 |
| INT IV                                     | 5,72E-02                     | 5,47E-02 | 4,93E-02 | 4,63E-02                     | 5,04E-02 | 4,06E-02 | 3,26E-02                          | 4,32E-02 | 3,70E-02 | 1,03E-02                          | 1,48E-02 | 9,09E-03 |
| INT XII                                    | 1,94E-02                     | 7,40E-03 | 1,62E-02 | 1,85E-02                     | 1,99E-02 | 1,11E-02 | 1,40E-02                          | 1,91E-02 | 1,23E-02 | 5,71E-03                          | 8,91E-03 | 5,20E-03 |
| ALG9                                       | 1,19E-02                     | 1,24E-02 | 1,04E-02 | 9,49E-03                     | 1,29E-02 | 6,55E-03 | 8,12E-03                          | 6,20E-03 | 7,84E-03 | 6,26E-03                          | 7,99E-03 | 5,30E-03 |

T-TEST PAIRED SAMPLES

|         | 1 VS 2 | 1 VS 3 | 1 VS 4       | 2 VS 4 | 3 VS 4 |
|---------|--------|--------|--------------|--------|--------|
| CEN4 L  | 0,051  | 0,460  | <b>0,049</b> | 0,103  | 0,038  |
| CEN4 R  | 0,143  | 0,445  | <b>0,034</b> | 0,006  | 0,164  |
| CEN12 L | 0,382  | 0,026  | <b>0,022</b> | 0,002  | 0,040  |
| CEN12 R | 0,242  | 0,095  | <b>0,017</b> | 0,012  | 0,002  |
| INT IV  | 0,055  | 0,062  | <b>0,003</b> | 0,002  | 0,006  |
| INT XII | 0,725  | 0,899  | <b>0,241</b> | 0,041  | 0,011  |
| ALG9    | 0,273  | 0,060  | <b>0,005</b> | 0,096  | 0,584  |

NO AB

|         |          |          |          |
|---------|----------|----------|----------|
| CEN4 L  | 3,36E-04 | 4,96E-04 | 2,57E-04 |
| CEN4 R  | 5,21E-04 | 4,17E-04 | 4,67E-04 |
| CEN12 L | 7,49E-04 | 5,95E-04 | 5,17E-04 |
| CEN12 R | 3,67E-04 | 8,80E-04 | 5,54E-04 |
| INT IV  | 3,80E-04 | 5,57E-04 | 4,68E-04 |
| INT XII | 4,24E-04 | 8,36E-04 | 3,14E-04 |
| ALG9    | 8,46E-04 | 7,88E-04 | 5,37E-04 |

Source data Figure 5a .ChIP raw data represented in figures 5a. p-values obtained are also presented below.

|                      |        | SIGNAL QUANTIFICATION |       |            |       |             |
|----------------------|--------|-----------------------|-------|------------|-------|-------------|
|                      |        | BIOLOGICAL REPLICATE  | H2B   | ACT1 (H2B) | H2AZ  | ACT1 (H2AZ) |
| wild type            | vector | 1                     | 13365 | 20620      | 23190 | 18655       |
|                      |        | 2                     | 7970  | 3767       | 22700 | 5608        |
|                      |        | 3                     | 18621 | 23688      | 24155 | 23638       |
| 2 $\mu$ $\Delta$ NEG |        | 1                     | 20524 | 32855      | 20788 | 33570       |
|                      |        | 2                     | 21869 | 30057      | 16679 | 29344       |
|                      |        | 3                     | 17881 | 27717      | 26120 | 24385       |
|                      |        | 4                     | 8407  | 20558      | 25660 | 21505       |
|                      |        | 5                     | 23246 | 31367      | 29210 | 31716       |

|                      |        | LEVELS RELATIVE TO ACT1 LOADING CONTROL |      |      | AVERAGE               |      |      |
|----------------------|--------|-----------------------------------------|------|------|-----------------------|------|------|
|                      |        | BIOLOGICAL REPLICATE                    | H2B  | H2AZ | H2B                   | H2AZ |      |
| wild type            | vector | 1                                       | 0,65 | 0,93 | VECTOR                | 0,72 | 0,84 |
|                      |        | 2                                       | 2,12 | 2,56 | 2- $\mu$ $\Delta$ NEG | 0,68 | 0,47 |
|                      |        | 3                                       | 0,79 | 0,76 |                       | SD   |      |
| 2 $\mu$ $\Delta$ NEG |        | 1                                       | 0,62 | 0,43 |                       | H2B  | H2AZ |
|                      |        | 2                                       | 0,73 | 0,40 | VECTOR                | 0,10 | 0,12 |
|                      |        | 3                                       | 0,65 | 0,64 | 2- $\mu$ $\Delta$ NEG | 0,06 | 0,11 |
|                      |        | 4                                       | 0,41 | 0,53 |                       |      |      |
|                      |        | 5                                       | 0,74 | 0,42 |                       |      |      |

\* EXCLUDED FROM QUANTIFICATION, VERY LOW LEVELS OF ACT1

\*\* EXCLUDED FROM QUANTIFICATION, PARTIALLY DIPLOID IN FACS

Source data Figure 5c. Quantification of the signal obtained for histones H2B and H2A.Z in asynchronous wild type cells transformed with an empty vector or the 2 $\mu$  $\Delta$ NEG vector.

|                    | number of cells (%) |      |         |      |         |      |         |      |         |      |      |      |
|--------------------|---------------------|------|---------|------|---------|------|---------|------|---------|------|------|------|
|                    | 1ST EXP             |      | 2ND EXP |      | 3RD EXP |      | 4TH EXP |      | AVERAGE |      | SD   |      |
|                    | n                   | 2n   | n       | 2n   | n       | 2n   | n       | 2n   | n       | 2n   | n    | 2n   |
| 2 $\mu$ NEG+vector | 98,52               | 1,48 | 97,85   | 2,15 | 98,90   | 1,10 | 99,44   | 0,56 | 98,42   | 1,58 | 0,53 | 0,53 |
| 2 $\mu$ NEG+HTZ1   | 99,21               | 0,79 | 99,22   | 0,78 | 99,11   | 0,89 | 99,76   | 0,24 | 99,18   | 0,82 | 0,06 | 0,06 |

t-test (paired 1 tail) | 0,045

Source data Figure 5e. Quantification of the number of diploids observed in cells transformed simultaneously with the 2 $\mu$  $\Delta$ NEG vector and an empty vector or with the first and plasmid pRS425-HTZ1.

|                 |               | DAY 1   |         |         | DAY 2   |         |         | DAY 3   |         |         | DAY 4   |         |         |
|-----------------|---------------|---------|---------|---------|---------|---------|---------|---------|---------|---------|---------|---------|---------|
|                 |               | HAPLOID | MIXTURE | DIPLOID | HAPLOID | MIXTURE | DIPLOID | HAPLOID | MIXTURE | DIPLOID | HAPLOID | MIXTURE | DIPLOID |
| 1ST EXP (n = 8) | wild type     | 8       | 0       | 0       | 6       | 2       | 0       | 2       | 6       | 0       | 2       | 2       | 4       |
|                 | swr1 $\Delta$ | 0       | 0       | 8       | 0       | 0       | 8       | 0       | 0       | 8       | 0       | 0       | 8       |
| 2ND EXP (n = 7) | wild type     | 6       | 1       | 0       | 5       | 2       | 0       | 1       | 4       | 2       | 1       | 3       | 3       |
|                 | swr1 $\Delta$ | 3       | 3       | 1       | 0       | 2       | 5       | 0       | 0       | 7       | 0       | 0       | 7       |
| TOTAL (%)       | wild type     | 14      | 1       | 0       | 11      | 4       | 0       | 3       | 10      | 2       | 3       | 5       | 7       |
|                 | swr1 $\Delta$ | 3       | 3       | 9       | 0       | 2       | 13      | 0       | 0       | 15      | 0       | 0       | 15      |
|                 | wild type     | 93      | 7       | 0       | 73      | 27      | 0       | 20      | 67      | 13      | 20      | 33      | 47      |
|                 | swr1 $\Delta$ | 20      | 20      | 60      | 0       | 13      | 87      | 0       | 0       | 100     | 0       | 0       | 100     |

Source data Figure 5f: Quantification of the number of haploids, diploids and cells in which a mixed profile can be observed in wild type cells or swr1 $\Delta$  cells transformed with the 2 $\mu$  $\Delta$ NEG. Two independent experiments were performed. Experiment 1 was carried out with 8 independent colonies for each background and also carried two candidates transformed with an empty vector that were measured only on day 1 and day 4. Experiment 2 was performed with 7 independent colonies and two empty vectors for each genetic background. All cells transformed with the empty vector were haploid at day 1 and 4.

|        | rad53-AID CONTROL |          |          |          |          | rad53-AID TREATED |          |          |          |          |
|--------|-------------------|----------|----------|----------|----------|-------------------|----------|----------|----------|----------|
|        | 1                 | 2        | 3        | 4        | 5        | 1                 | 2        | 3        | 4        | 5        |
| CEN4 L | 5,74E-04          | 4,34E-04 | 6,86E-01 | 6,06E-01 | 1,46E+00 | 1,03E-03          | 2,23E-04 | 5,40E-01 | 3,24E-01 | 8,52E-01 |
| CEN4 R | 5,39E-04          | 4,38E-04 | 6,25E-01 | 1,53E-01 | 1,77E-01 | 1,18E-03          | 2,13E-04 | 3,17E-01 | 1,79E-01 | 2,59E-01 |
| CEN12L | 8,60E-04          | 6,90E-04 | 1,17E+00 | 3,45E-01 | 4,93E-01 | 1,10E-03          | 4,01E-04 | 8,83E-01 | 3,37E-01 | 6,45E-01 |
| CEN12R | 6,46E-04          | 5,21E-04 | 1,13E+00 | 2,68E-01 | 4,21E-01 | 1,10E-03          | 3,23E-04 | 7,31E-01 | 2,92E-01 | 4,63E-01 |

  

|        | Ism1 rad53-AID CONTROL |          |          |          |          | Ism1 rad53-AID TREATED |          |          |          |          | NO TAG   |          |
|--------|------------------------|----------|----------|----------|----------|------------------------|----------|----------|----------|----------|----------|----------|
|        | 1                      | 2        | 3        | 4        | 5        | 1                      | 2        | 3        | 4        | 5        | 1        | 2        |
| CEN4 L | 2,27E-04               | 1,54E-04 | 9,27E-01 | 6,70E-01 | 4,89E-01 | 9,70E-05               | 3,02E-05 | 8,22E-01 | 6,53E-01 | 1,74E+00 | 2,38E-06 | 3,76E-06 |
| CEN4 R | 1,59E-04               | 1,28E-04 | 2,18E-01 | 3,36E-02 | 9,11E-02 | 8,29E-05               | 3,68E-05 | 2,72E-02 | 2,95E-02 | 1,13E-02 | 1,10E-06 | 1,25E-06 |
| CEN12L | 3,17E-04               | 1,24E-04 | 3,26E-01 | 6,01E-02 | 1,51E-01 | 1,24E-04               | 7,06E-05 | 3,21E-02 | 4,16E-02 | 1,10E-02 | 2,73E-06 | 2,82E-06 |
| CEN12R | 2,27E-04               | 1,29E-04 | 2,73E-01 | 5,20E-02 | 1,25E-01 | 1,17E-04               | 5,60E-05 | 2,94E-02 | 2,71E-02 | 1,05E-02 | 1,89E-06 | 0,00E+00 |

T-TEST PAIRED SAMPLES (1 tail)

|         | 1 VS 2 | 1 VS 3 | 1 VS 4       | 2 VS 4 | 3 VS 4 |
|---------|--------|--------|--------------|--------|--------|
| CEN4 L  | 0,071  | 0,284  | <b>0,079</b> | 0,070  | 0,215  |
| CEN4 R  | 0,296  | 0,088  | <b>0,091</b> | 0,042  | 0,107  |
| CEN12 L | 0,356  | 0,064  | <b>0,070</b> | 0,052  | 0,094  |
| CEN12 R | 0,235  | 0,078  | <b>0,079</b> | 0,051  | 0,088  |

**Source data Figure 5g.** ChIP raw data represented in figure 5g for Brn1-HA ChIP. P-values and all statistical tests performed are indicated.

|         | <i>rad53-AID Ism1Δ prs425</i> CONTROL (1) |          |          | <i>rad53-AID Ism1Δ prs425</i> TREATED (2) |          |          | <i>rad53-AID Ism1Δ prs425-HTZ1</i> CONTROL (3) |          |          | <i>rad53-AID Ism1Δ prs425-HTZ1</i> TREATED (4) |          |          |
|---------|-------------------------------------------|----------|----------|-------------------------------------------|----------|----------|------------------------------------------------|----------|----------|------------------------------------------------|----------|----------|
|         | 1                                         | 2        | 3        | 1                                         | 2        | 3        | 1                                              | 2        | 3        | 1                                              | 2        | 3        |
| CEN4 L  | 1,67E-01                                  | 1,07E-01 | 6,10E-02 | 2,99E-02                                  | 4,15E-02 | 4,95E-02 | 3,49E-02                                       | 2,95E-02 | 8,72E-02 | 3,87E-02                                       | 7,62E-02 | 8,70E-02 |
| CEN4 R  | 3,31E-02                                  | 2,81E-02 | 3,23E-02 | 1,28E-02                                  | 1,03E-02 | 1,50E-02 | 2,56E-02                                       | 1,41E-02 | 2,06E-02 | 7,39E-03                                       | 5,81E-03 | 9,25E-03 |
| CEN12 L | 3,73E-02                                  | 2,95E-02 | 3,07E-02 | 8,69E-03                                  | 9,24E-03 | 1,32E-02 | 2,02E-02                                       | 1,53E-02 | 2,27E-02 | 1,12E-02                                       | 6,30E-03 | 9,06E-03 |
| CEN12 R | 2,77E-02                                  | 1,77E-02 | 1,39E-02 | 7,21E-03                                  | 1,17E-02 | 1,64E-02 | 2,29E-02                                       | 1,30E-02 | 1,61E-02 | 6,71E-03                                       | 7,21E-03 | 9,81E-03 |
| INT IV  | 6,20E-02                                  | 4,26E-02 | 3,93E-02 | 1,22E-02                                  | 1,25E-02 | 1,83E-02 | 2,65E-02                                       | 2,25E-02 | 1,74E-02 | 7,00E-03                                       | 7,71E-03 | 1,21E-02 |
| INT XII | 2,09E-02                                  | 2,03E-02 | 1,69E-02 | 5,98E-03                                  | 9,00E-03 | 1,55E-02 | 1,70E-02                                       | 2,10E-02 | 2,45E-02 | 9,33E-03                                       | 1,04E-02 | 8,69E-03 |

T-TEST PAIRED SAMPLES (1 tail)

|         | 1 VS 2       | 1 VS 3 | 1 VS 4 | 2 VS 4 | 3 VS 4       |
|---------|--------------|--------|--------|--------|--------------|
| CEN4 L  | <b>0,094</b> | 0,159  | 0,214  | 0,049  | <b>0,191</b> |
| CEN4 R  | <b>0,001</b> | 0,014  | 0,001  | 0,003  | <b>0,025</b> |
| CEN12 L | <b>0,011</b> | 0,020  | 0,002  | 0,265  | <b>0,010</b> |
| CEN12 R | <b>0,177</b> | 0,198  | 0,069  | 0,082  | <b>0,054</b> |
| INT IV  | <b>0,029</b> | 0,017  | 0,021  | 0,003  | <b>0,043</b> |
| INT XII | <b>0,075</b> | 0,353  | 0,005  | 0,422  | <b>0,020</b> |

**Source data Figure 5-Figure Supplement 5c.** ChIP raw data represented in figure 5c for H2A.Z ChIP. p-values and all statistical tests performed are indicated.
