# Supplementary material for: High levels of histones promote whole-genome-duplications and trigger a Swe1WEE1-dependent phosphorylation of Cdc28CDK1
Source: PubMed Central journal article supplement (PMC5871333; doi:10.7554/elife.35337), 2018-03-27
Supplement: elife-35337-fig6-data1.pdf [file elife-35337-fig6-data1.pdf]

| RAW DATA            | 1st experiment |       |                |      | 2nd experiment |      |                |       |
|---------------------|----------------|-------|----------------|------|----------------|------|----------------|-------|
|                     | rad53-AID      |       | rad53-AID lsm1 |      | rad53-AID      |      | rad53-AID lsm1 |       |
|                     | untreated      | NAA   | untreated      | NAA  | untreated      | NAA  | untreated      | NAA   |
| MAD2 FOCI-MTW1 FOCI | 1              | 0     | 0              | 1    | 0              | 1    | 0              | 0     |
| MAD2 FOCI ALONE     | 0              | 0     | 0              | 0    | 0              | 0    | 0              | 0     |
| NO MAD2 FOCI        | 155            | 126   | 122            | 157  | 104            | 115  | 120            | 112   |
| n                   | 156            | 126   | 122            | 158  | 104            | 116  | 120            | 112   |
| PERCENTAGE          |                |       |                |      |                |      |                |       |
| MAD2 FOCI-MTW1 FOCI | 0,6            | 0,0   | 0,0            | 0,6  | 0,0            | 0,9  | 0,0            | 0,0   |
| MAD2 FOCI ALONE     | 0,0            | 0,0   | 0,0            | 0,0  | 0,0            | 0,0  | 0,0            | 0,0   |
| NO MAD2 FOCI        | 99,4           | 100,0 | 100,0          | 99,4 | 100,0          | 99,1 | 100,0          | 100,0 |

Source data Figure 6b. Raw data for the quantification of Mad2 foci.

|                |         | % IP     |          |          |          |          |          |
|----------------|---------|----------|----------|----------|----------|----------|----------|
|                |         | CEN4 R   | CEN4 L   | INT IV   | CEN12L   | CEN12 R  | INT XII  |
| 1st experiment | MET     | 8,49E-03 | 1,01E-02 | 4,76E-04 | 2,27E-02 | 1,21E-02 | 1,19E-03 |
|                | MET+NOC | 7,64E-02 | 5,63E-02 | 1,78E-03 | 3,19E-01 | 7,19E-02 | 7,72E-03 |
|                | MET+NAA | 1,11E-02 | 1,33E-02 | 2,56E-04 | 2,18E-02 | 1,44E-02 | 1,06E-03 |
| 2nd experiment | MET     | 2,47E-02 | 1,64E-02 | 3,20E-03 | 3,97E-02 | 2,97E-02 | 4,62E-03 |
|                | MET+NOC | 4,45E-02 | 5,21E-02 | 1,91E-03 | 8,93E-02 | 6,14E-02 | 3,99E-03 |
|                | MET+NAA | 3,43E-02 | 2,08E-02 | 1,01E-02 | 4,72E-02 | 4,14E-02 | 1,47E-02 |

|            |   | STUDENT T-TEST PAIRED SAMPLES (2 TAILS) |        |        |        |         |         |
|------------|---|-----------------------------------------|--------|--------|--------|---------|---------|
|            |   | CEN4 R                                  | CEN4 L | INT IV | CEN12L | CEN12 R | INT XII |
| MET VS NOC |   | 0,32                                    | 0,08   | 1,00   | 0,39   | 0,19    | 0,56    |
| MET VS NAA | ✓ | 0,33                                    | 0,10   | 0,52   | 0,58   | 0,38    | 0,51    |
| NOC VS NAA |   | 0,40                                    | 0,10   | 0,62   | 0,41   | 0,29    | 0,85    |

|            |   | STUDENT T-TEST PAIRED (1 TAIL) |        |        |        |         |         |
|------------|---|--------------------------------|--------|--------|--------|---------|---------|
|            |   | CEN4 R                         | CEN4 L | INT IV | CEN12L | CEN12 R | INT XII |
| MET VS NOC |   | 0,16                           | 0,04   | 0,50   | 0,20   | 0,09    | 0,28    |
| MET VS NAA | ✓ | 0,17                           | 0,05   | 0,26   | 0,29   | 0,19    | 0,25    |
| NOC VS NAA |   | 0,20                           | 0,05   | 0,31   | 0,21   | 0,14    | 0,43    |

Source data Figure 6c. Raw data for the ChIP experiment to measure Sgo1-HA recruitment. Two independent biological replicates. p-values and statistical tests used to obtain them are indicated.
