# Supplementary material for: High levels of histones promote whole-genome-duplications and trigger a Swe1WEE1-dependent phosphorylation of Cdc28CDK1
Source: PubMed Central journal article supplement (PMC5871333; doi:10.7554/elife.35337), 2018-03-27
Supplement: elife-35337-fig7-data1.pdf [file elife-35337-fig7-data1.pdf]

|                        |              |          | DDC2 FOCI (%) | n   |                       | N    | AVERAGE | SD   | SEM  |
|------------------------|--------------|----------|---------------|-----|-----------------------|------|---------|------|------|
| BIOLOGICAL REPLICATE 1 | VECTOR       | colony 1 | 5,6           | 213 | VECTOR                | 1065 | 6,17    | 0,41 | 0,20 |
|                        |              | colony 2 | 6,3           | 301 | 2 $\mu$ -NEG          | 1068 | 6,15    | 1,97 | 0,99 |
|                        | 2 $\mu$ -NEG | colony 1 | 6,1           | 314 |                       |      |         |      |      |
|                        |              | colony 2 | 4,1           | 98  | T-TEST PAIRED SAMPLES |      |         |      |      |
| BIOLOGICAL REPLICATE 2 | VECTOR       | colony 1 | 6,2           | 307 |                       |      |         |      |      |
|                        |              | colony 2 | 6,6           | 244 |                       |      |         |      |      |
|                        | 2 $\mu$ -NEG | colony 1 | 5,6           | 463 |                       |      |         |      |      |
|                        |              | colony 2 | 8,8           | 193 |                       |      |         |      |      |

**Source data Figure 7b.** Raw data for the quantification of Ddc2 foci. Two independent experiments with two different colonies analysed on each experiment.

**TYPES**

- A
- B
- C

CLEAR SPOT OF MAD2 THAT COLOCALIZES WITH SIGNAL OF MTW1  
 PARTIAL CO-LOCALISATION, COLOCALISATION BUT VERY WEAK MAD2 SIGNAL  
 WEAK SPOTS OF MAD2 THAT DO NOT CO-LOCALIZE

|                        |              | NUMBER OF EVENTS PER MIL ‰ |      |      |     | type A events |                                              |      |     |     |      |
|------------------------|--------------|----------------------------|------|------|-----|---------------|----------------------------------------------|------|-----|-----|------|
|                        |              | A                          | B    | C    | n   | N             | AVERAGE                                      | SD   | SEM |     |      |
| BIOLOGICAL REPLICATE 1 | VECTOR       | colony 1                   | 3,3  | 6,5  | 3,3 | 306           | VECTOR                                       | 2260 | 4,6 | 3,7 | 1,85 |
|                        |              | colony 2                   | 7,6  | 0    | 0   | 264           | 2 $\mu$ -NEG                                 | 2500 | 9,3 | 1,4 | 0,7  |
|                        | 2 $\mu$ -NEG | colony 1                   | 9,1  | 9,1  | 0   | 660           |                                              |      |     |     |      |
|                        |              | colony 2                   | 9,7  | 9,7  | 1,9 | 515           | t-test (paired samples, two tails) 0,0311072 |      |     |     |      |
| BIOLOGICAL REPLICATE 2 | VECTOR       | colony 1                   | 7,6  | 15,3 | 7,6 | 262           |                                              |      |     |     |      |
|                        |              | colony 2                   | 0    | 7,9  | 0   | 253           |                                              |      |     |     |      |
|                        | 2 $\mu$ -NEG | colony 1                   | 10,9 | 0    | 0   | 275           |                                              |      |     |     |      |
|                        |              | colony 2                   | 7,5  | 9,3  | 3,7 | 535           |                                              |      |     |     |      |

**Source data Figure 7c.** Raw data for the quantification of Mad2 foci. Two independent experiments with two different colonies analysed on each experiment. The representation observed in figure 7c only includes Mad2 foci that clearly colocalised to Mtw1 foci (Type A events).
