# Supplementary material for: High levels of histones promote whole-genome-duplications and trigger a Swe1WEE1-dependent phosphorylation of Cdc28CDK1
Source: PubMed Central journal article supplement (PMC5871333; doi:10.7554/elife.35337), 2018-03-27
Supplement: elife-35337-fig8-data1.pdf [file elife-35337-fig8-data1.pdf]

|                    |                  | 2 $\mu$ ΔNEG |         |         |         |         |         |         |         |         |         |         |         |
|--------------------|------------------|--------------|---------|---------|---------|---------|---------|---------|---------|---------|---------|---------|---------|
|                    |                  | DAY 1        |         |         | DAY 2   |         |         | DAY 3   |         |         | DAY 4   |         |         |
|                    |                  | HAPLOID      | MIXTURE | DIPLOID | HAPLOID | MIXTURE | DIPLOID | HAPLOID | MIXTURE | DIPLOID | HAPLOID | MIXTURE | DIPLOID |
| FIRST REP (n = 4)  | <i>wild type</i> | 4            | 0       | 0       | 1       | 3       | 0       | 0       | 1       | 3       | 1       | 1       | 2       |
|                    | <i>swe1Δ</i>     | 1            | 2       | 1       | 0       | 0       | 4       | 0       | 0       | 4       | 0       | 0       | 4       |
|                    | <i>mad2Δ</i>     | 0            | 0       | 4       | 0       | 0       | 4       | 0       | 0       | 4       | 0       | 0       | 4       |
| SECOND REP (n = 4) | <i>wild type</i> | 4            | 0       | 0       | 1       | 3       | 0       | 1       |         | 3       | 1       | 1       | 2       |
|                    | <i>swe1Δ</i>     | 1            | 1       | 2       | 0       | 0       | 4       | 0       | 0       | 4       | 0       | 0       | 4       |
|                    | <i>mad2Δ</i>     | 0            | 0       | 4       | 0       | 0       | 4       | 0       | 0       | 4       | 0       | 0       | 4       |

  

|                    |                  | empty vector |         |         |         |         |         |         |         |         |         |         |         |
|--------------------|------------------|--------------|---------|---------|---------|---------|---------|---------|---------|---------|---------|---------|---------|
|                    |                  | DAY 1        |         |         | DAY 2   |         |         | DAY 3   |         |         | DAY 4   |         |         |
|                    |                  | HAPLOID      | MIXTURE | DIPLOID | HAPLOID | MIXTURE | DIPLOID | HAPLOID | MIXTURE | DIPLOID | HAPLOID | MIXTURE | DIPLOID |
| FIRST REP (n = 4)  | <i>wild type</i> | 2            | 0       | 0       | -       | -       | -       | -       | -       | -       | 2       | 0       | 0       |
|                    | <i>swe1Δ</i>     | 2            | 0       | 0       | -       | -       | -       | -       | -       | -       | 2       | 0       | 0       |
|                    | <i>mad2Δ</i>     | 2            | 0       | 0       | -       | -       | -       | -       | -       | -       | 2       | 0       | 0       |
| SECOND REP (n = 4) | <i>wild type</i> | 2            | 0       | 0       | -       | -       | -       | -       | -       | -       | 2       | 0       | 0       |
|                    | <i>swe1Δ</i>     | 2            | 0       | 0       | -       | -       | -       | -       | -       | -       | 2       | 0       | 0       |
|                    | <i>mad2Δ</i>     | 1            | 0       | 0       | -       | -       | -       | -       | -       | -       | 1       | 0       | 0       |

  

|                    |                  | 2 $\mu$ ΔNEG (IN %) |         |         |         |         |         |         |         |         |         |         |         |
|--------------------|------------------|---------------------|---------|---------|---------|---------|---------|---------|---------|---------|---------|---------|---------|
|                    |                  | DAY 1               |         |         | DAY 2   |         |         | DAY 3   |         |         | DAY 4   |         |         |
|                    |                  | HAPLOID             | MIXTURE | DIPLOID | HAPLOID | MIXTURE | DIPLOID | HAPLOID | MIXTURE | DIPLOID | HAPLOID | MIXTURE | DIPLOID |
| FIRST REP (n = 4)  | <i>wild type</i> | 100                 | 0       | 0       | 25      | 75      | 0       | 0       | 25      | 75      | 25      | 25      | 50      |
|                    | <i>swe1Δ</i>     | 25                  | 50      | 25      | 0       | 0       | 100     | 0       | 0       | 100     | 0       | 0       | 100     |
|                    | <i>mad2Δ</i>     | 0                   | 0       | 100     | 0       | 0       | 100     | 0       | 0       | 100     | 0       | 0       | 100     |
| SECOND REP (n = 4) | <i>wild type</i> | 100                 | 0       | 0       | 25      | 75      | 0       | 25      | 0       | 75      | 25      | 25      | 50      |
|                    | <i>swe1Δ</i>     | 25                  | 25      | 50      | 0       | 0       | 100     | 0       | 0       | 100     | 0       | 0       | 100     |
|                    | <i>mad2Δ</i>     | 0                   | 0       | 100     | 0       | 0       | 100     | 0       | 0       | 100     | 0       | 0       | 100     |

  

|         |                  | 2 $\mu$ ΔNEG ( AVERAGE, IN %) |         |         |         |         |         |         |         |         |         |         |         |
|---------|------------------|-------------------------------|---------|---------|---------|---------|---------|---------|---------|---------|---------|---------|---------|
|         |                  | DAY 1                         |         |         | DAY 2   |         |         | DAY 3   |         |         | DAY 4   |         |         |
|         |                  | HAPLOID                       | MIXTURE | DIPLOID | HAPLOID | MIXTURE | DIPLOID | HAPLOID | MIXTURE | DIPLOID | HAPLOID | MIXTURE | DIPLOID |
| AVERAGE | <i>wild type</i> | 100                           | 0       | 0       | 25      | 75      | 0       | 13      | 13      | 75      | 25      | 25      | 50      |
|         | <i>swe1Δ</i>     | 25                            | 38      | 38      | 0       | 0       | 100     | 0       | 0       | 100     | 0       | 0       | 100     |
|         | <i>mad2Δ</i>     | 0                             | 0       | 100     | 0       | 0       | 100     | 0       | 0       | 100     | 0       | 0       | 100     |

  

|    |                  | 2 $\mu$ ΔNEG ( SD, IN %) |         |         |         |         |         |         |         |         |         |         |         |
|----|------------------|--------------------------|---------|---------|---------|---------|---------|---------|---------|---------|---------|---------|---------|
|    |                  | DAY 1                    |         |         | DAY 2   |         |         | DAY 3   |         |         | DAY 4   |         |         |
|    |                  | HAPLOID                  | MIXTURE | DIPLOID | HAPLOID | MIXTURE | DIPLOID | HAPLOID | MIXTURE | DIPLOID | HAPLOID | MIXTURE | DIPLOID |
| SD | <i>wild type</i> | 0                        | 0       | 0       | 0       | 0       | 0       | 18      | 18      | 0       | 0       | 0       | 0       |
|    | <i>swe1Δ</i>     | 0                        | 18      | 18      | 0       | 0       | 0       | 0       | 0       | 0       | 0       | 0       | 0       |
|    | <i>mad2Δ</i>     | 0                        | 0       | 0       | 0       | 0       | 0       | 0       | 0       | 0       | 0       | 0       | 0       |

**Source data Figure 8a:** Quantification of the number of haploids, diploids and cells in which a mixed profile can be observed in wild type cells *mad2Δ* or *swe1Δ* cells transformed with the 2 $\mu$ ΔNEG. Two independent experiments were performed. Experiment 1 was carried out with 4 independent colonies for each background and also carried two candidates transformed with an empty vector that were measured only on day 1 and day 4. Experiment 2 was performed similarly but one of the spores of *mad2Δ* cells transformed with the empty vector were haploid was lost (contamination).

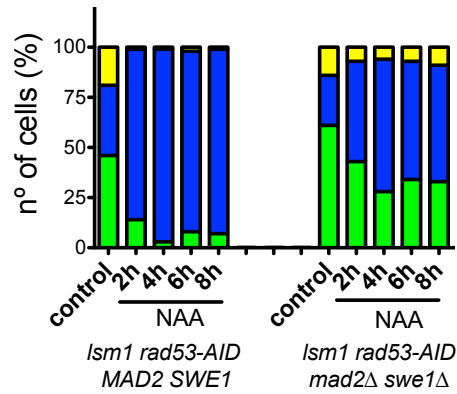

| 1ST EXP         |  | <i>lsm1Δ rad53-AID</i> |     |     |     |     | <i>lsm1Δ rad53-AID swe1Δ mad2Δ</i> |  |     |     |     |     |     |
|-----------------|--|------------------------|-----|-----|-----|-----|------------------------------------|--|-----|-----|-----|-----|-----|
| time in NAA (h) |  | 0                      | 2   | 4   | 6   | 8   | time in NAA (h)                    |  | 0   | 2   | 4   | 6   | 8   |
| G1              |  | 46                     | 14  | 3   | 8   | 7   | G1                                 |  | 61  | 43  | 28  | 34  | 33  |
| 1 nucleus       |  | 35                     | 85  | 96  | 90  | 92  | 1 nucleus                          |  | 25  | 50  | 66  | 59  | 58  |
| 2 nuclei        |  | 19                     | 1   | 1   | 2   | 1   | 2 nuclei                           |  | 14  | 7   | 6   | 7   | 9   |
| n               |  | 100                    | 100 | 100 | 100 | 100 | n                                  |  | 100 | 100 | 100 | 100 | 100 |
| 2ND EXP         |  | <i>lsm1Δ rad53-AID</i> |     |     |     |     | <i>lsm1Δ rad53-AID swe1Δ mad2Δ</i> |  |     |     |     |     |     |
| time in NAA (h) |  | 0                      | 2   | 4   | 6   | 8   | time in NAA (h)                    |  | 0   | 2   | 4   | 6   | 8   |
| G1              |  | 50                     | 17  | 8   | 4   | 11  | G1                                 |  | 53  | 45  | 24  | 28  | 27  |
| 1 nucleus       |  | 41                     | 80  | 90  | 95  | 84  | 1 nucleus                          |  | 39  | 52  | 70  | 65  | 66  |
| 2 nuclei        |  | 9                      | 3   | 2   | 1   | 5   | 2 nuclei                           |  | 8   | 3   | 6   | 7   | 7   |
| n               |  | 100                    | 100 | 100 | 100 | 100 | n                                  |  | 100 | 100 | 100 | 100 | 100 |

| AVERAGE         |  | <i>lsm1Δ rad53-AID</i> |      |     |      |    | <i>lsm1Δ rad53-AID swe1Δ mad2Δ</i> |    |    |    |    |
|-----------------|--|------------------------|------|-----|------|----|------------------------------------|----|----|----|----|
| time in NAA (h) |  | 0                      | 2    | 4   | 6    | 8  | 0                                  | 2  | 4  | 6  | 8  |
| G1              |  | 48                     | 15,5 | 5,5 | 6    | 9  | 57                                 | 44 | 26 | 31 | 30 |
| 1 nucleus       |  | 38                     | 82,5 | 93  | 92,5 | 88 | 32                                 | 51 | 68 | 62 | 62 |
| 2 nuclei        |  | 14                     | 2    | 1,5 | 1,5  | 3  | 11                                 | 5  | 6  | 7  | 8  |

| SD              |  | <i>lsm1Δ rad53-AID</i> |     |     |     |     | <i>lsm1Δ rad53-AID swe1Δ mad2Δ</i> |     |     |     |     |
|-----------------|--|------------------------|-----|-----|-----|-----|------------------------------------|-----|-----|-----|-----|
| time in NAA (h) |  | 0                      | 2   | 4   | 6   | 8   | 0                                  | 2   | 4   | 6   | 8   |
| G1              |  | 2,8                    | 2,1 | 3,5 | 2,8 | 2,8 | 5,7                                | 1,4 | 2,8 | 4,2 | 4,2 |
| 1 nucleus       |  | 4,2                    | 3,5 | 4,2 | 3,5 | 5,7 | 9,9                                | 1,4 | 2,8 | 4,2 | 5,7 |
| 2 nuclei        |  | 7,1                    | 1,4 | 0,7 | 0,7 | 2,8 | 4,2                                | 2,8 | 0,0 | 0,0 | 1,4 |

| ANOVA test ( <i>lsm1Δ rad53-AID</i> vs <i>lsm1Δ rad53-AID swe1Δ mad2Δ</i> ) |    |         |         |         |         |
|-----------------------------------------------------------------------------|----|---------|---------|---------|---------|
| time in NAA (h)                                                             | 0  | 2       | 4       | 6       | 8       |
| G1                                                                          | ns | p<0.001 | p<0.01  | p<0.001 | p<0.01  |
| 1 nucleus                                                                   | ns | p<0.001 | p<0.001 | p<0.001 | p<0.001 |
| 2 nuclei                                                                    | ns | ns      | ns      | ns      | ns      |

**Source data Figure 8b.** Raw data obtained in the two cell cycle kinetics performed to determine changes in the cell cycle distribution of *rad53-AID lsm1Δ* and *rad53-AID lsm1Δ mad2Δ swe1Δ* cells after treatment with NAA. Cells were fixed, stained with DAPI and classified according to morphology and number of nuclei using a 100x objective. The image on the top represents the numbers obtained in the second experiment, not included in the main text. p-values were obtained performing an ANOVA test, using Prism (5.0).

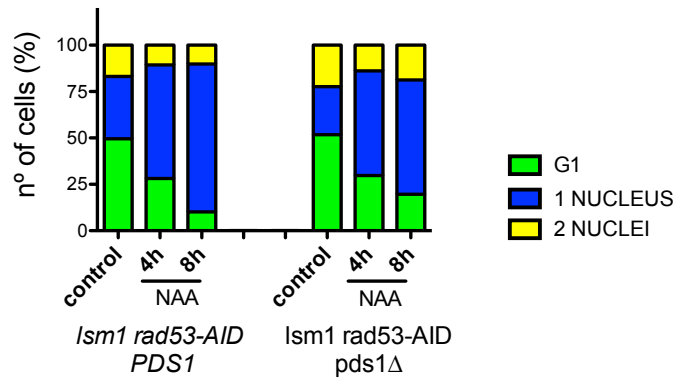

|                 | <i>lsm1Δ rad53-AID</i> |        |        | <i>lsm1Δ rad53-AID pds1Δ</i> |        |        | <i>lsm1Δ rad53-AID</i> |        |        | <i>lsm1Δ rad53-AID pds1Δ</i> |        |        |
|-----------------|------------------------|--------|--------|------------------------------|--------|--------|------------------------|--------|--------|------------------------------|--------|--------|
|                 | RAW DATA               |        |        | RAW DATA                     |        |        | %                      |        |        | %                            |        |        |
| 1st experiment  | AS                     | 4H NAA | 8H NAA | AS                           | 4H NAA | 8H NAA | AS                     | 4H NAA | 8H NAA | AS                           | 4H NAA | 8H NAA |
| G1              | 53                     | 29     | 12     | 58                           | 28     | 22     | 50                     | 28     | 10     | 52                           | 30     | 20     |
| bud, 1 nucleus  | 36                     | 63     | 94     | 29                           | 53     | 69     | 34                     | 61     | 80     | 26                           | 56     | 62     |
| bud, two nuclei | 18                     | 11     | 12     | 25                           | 13     | 21     | 17                     | 11     | 10     | 22                           | 14     | 19     |
| n               | 107                    | 103    | 118    | 112                          | 94     | 112    | 100                    | 100    | 100    | 100                          | 100    | 100    |
| 2nd experiment  | RAW DATA               |        |        | RAW DATA                     |        |        | %                      |        |        | %                            |        |        |
| G1              | AS                     | 4H NAA | 8H NAA | AS                           | 4H NAA | 8H NAA | AS                     | 4H NAA | 8H NAA | AS                           | 4H NAA | 8H NAA |
|                 | 76                     | 49     | 20     | 41                           | 45     | 35     | 44                     | 32     | 18     | 44                           | 41     | 30     |
| bud, 1 nucleus  | 57                     | 82     | 78     | 29                           | 50     | 61     | 33                     | 54     | 72     | 31                           | 45     | 53     |
| bud, two nuclei | 41                     | 20     | 11     | 23                           | 15     | 20     | 24                     | 13     | 10     | 25                           | 14     | 17     |
| n               | 174                    | 151    | 109    | 93                           | 110    | 116    |                        |        |        |                              |        |        |

|                 | t-test (paired, two tails) |        |        |
|-----------------|----------------------------|--------|--------|
|                 | AS                         | 4H NAA | 8H NAA |
| G1              | 0,386                      | 0,379  | 0,070  |
| bud, 1 nucleus  | 0,372                      | 0,185  | 0,016  |
| bud, two nuclei | 0,367                      | 0,421  | 0,058  |

|                 | t-test (paired, one tail) |        |        |
|-----------------|---------------------------|--------|--------|
|                 | AS                        | 4H NAA | 8H NAA |
| G1              | 0,193                     | 0,189  | 0,035  |
| bud, 1 nucleus  | 0,186                     | 0,092  | 0,008  |
| bud, two nuclei | 0,183                     | 0,211  | 0,029  |

**Source data Figure 8-Figure Supplement 8b.** Raw data obtained in the two cell cycle kinetics performed to determine changes in the cell cycle distribution of *rad53-AID lsm1Δ* and *rad53-AID lsm1Δ pds1Δ* cells after treatment with NAA. Cells were fixed, stained with DAPI and classified according to morphology and number of nuclei using a 100x objective. The image on the top represents the numbers obtained in the second experiment, not included in the main text. P-values are indicated in the panel below..
